# Supplementary material for: Simple and rapid preparation of orange-yellow fluorescent gold nanoclusters using dl-homocysteine as a reducing/stabilizing reagent and their application in cancer cell imaging
Source: Royal Society of Chemistry journal article supplement (doi:10.1039/c4ra13288b), 2015-01-01
Supplement: c4ra13288b1.pdf [file c4ra13288b1.pdf]

**Simple and rapid preparation of orange-yellow fluorescent gold nanoclusters using DL-homocysteine as a reducing/stabilizing reagent and their application in cancer cell imaging**

**Shouming Xu,<sup>a</sup> Hong Yang,<sup>b</sup> Kang Zhao,<sup>a</sup> Jianguo Li,<sup>a\*</sup> Liyun Mei,<sup>a</sup> Yun Xie,<sup>a</sup>  
Anping Deng <sup>a\*</sup>**

<sup>a</sup> The Key Lab of Health Chemistry & Molecular Diagnosis of Suzhou, College of Chemistry, Chemical Engineering and Materials Science, Soochow University, Suzhou 215123, China

<sup>b</sup> College of Pharmacy Sciences, Soochow University, Suzhou, 215123, China

\* Corresponding authors: Tel: +86 512 65882362; Fax: +86 512 65882362  
e-mail: [denganping@suda.edu.cn](mailto:denganping@suda.edu.cn), [denganping@163.com](mailto:denganping@163.com); [lijgsd@suda.edu.cn](mailto:lijgsd@suda.edu.cn)

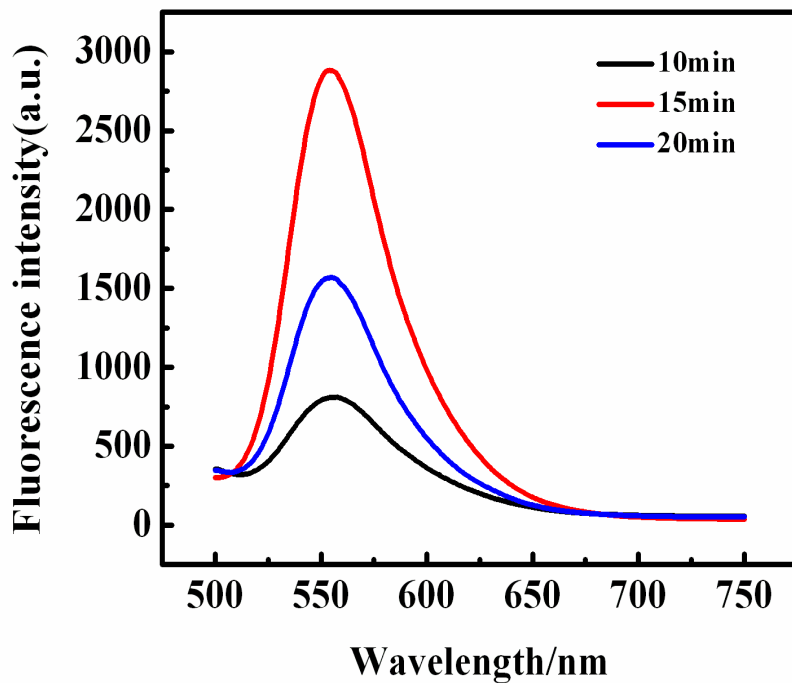

Fig.S1 Preparation of the hcy-protected gold nanoclusters with stirring for different times (10, 15 and 20 min)

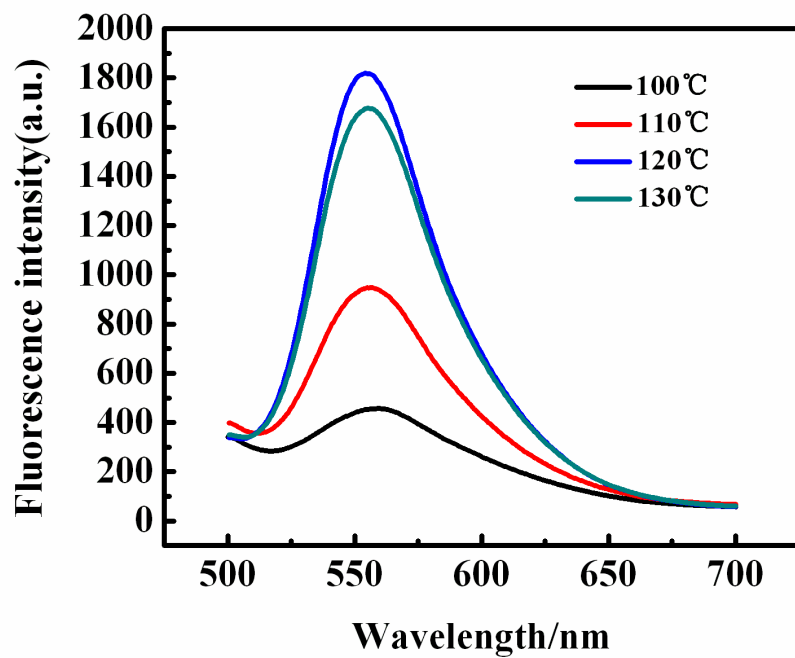

Fig. S2 Preparation of the hcy-protected gold nanoclusters with different temperatures.

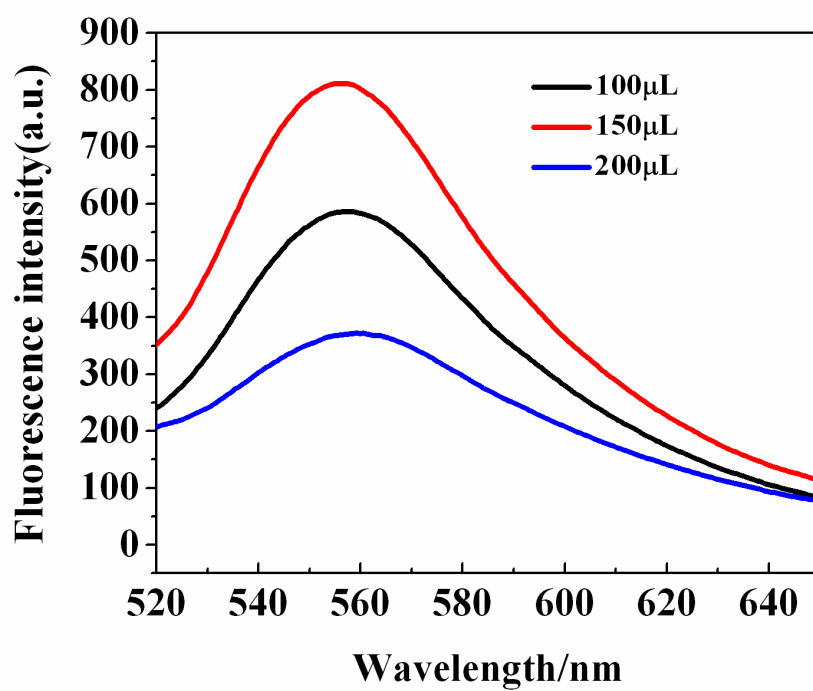

Fig. S3 Preparation of the hcy-protected gold naoclusters with the addition of different amounts of DL-homocysteine solution.

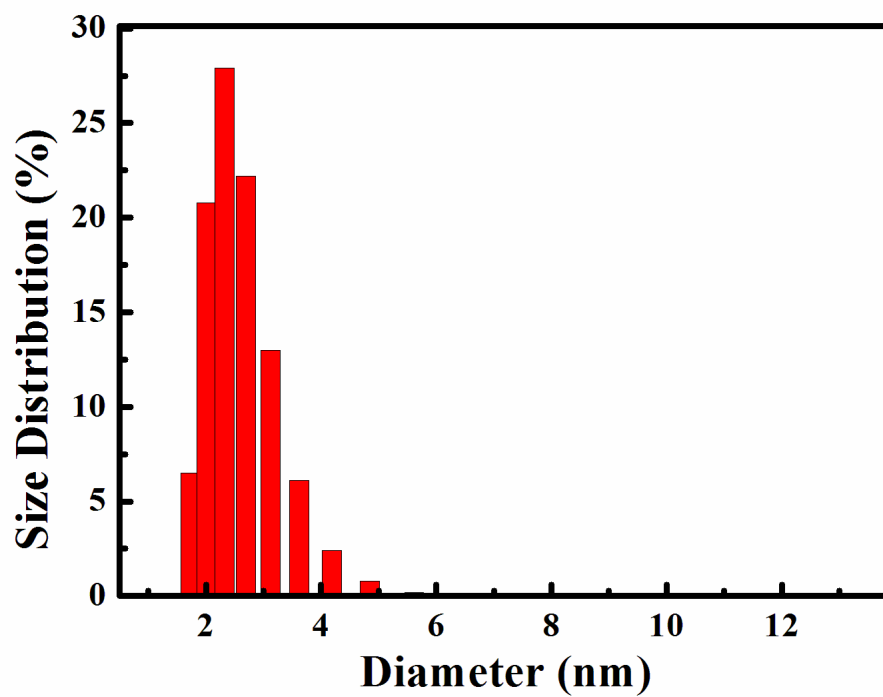

Fig. S4 Size distribution of an aqueous solution of hcy-AuNCs determined by DLS

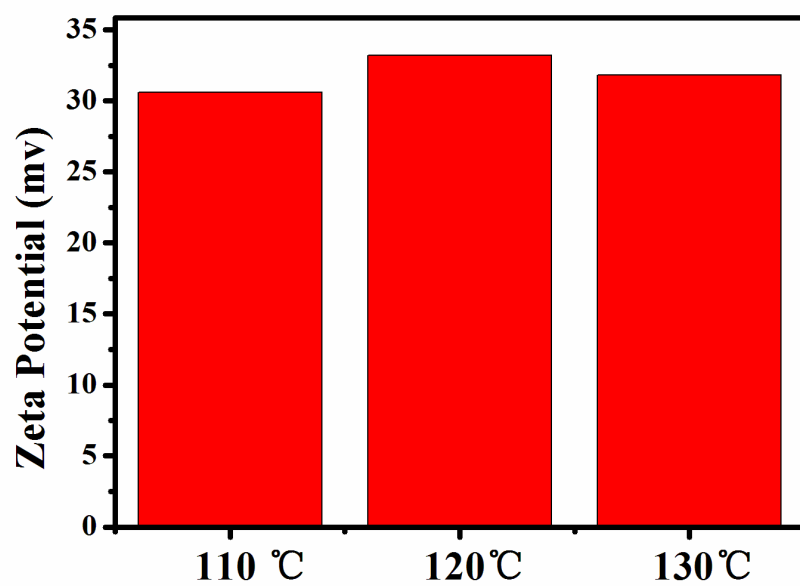

Fig. S5 The zeta potential of the Au NCs synthesized at different temperatures
